# Supplementary material for: The Role of Mms22p in DNA Damage Response in Candida albicans
Source: PubMed Central journal article supplement (PMC4683630; doi:10.1534/g3.115.021840), 2015-10-04
Supplement: supp_g3.115.021840_FigureS1.pdf [file supp_g3.115.021840_FigureS1.pdf]

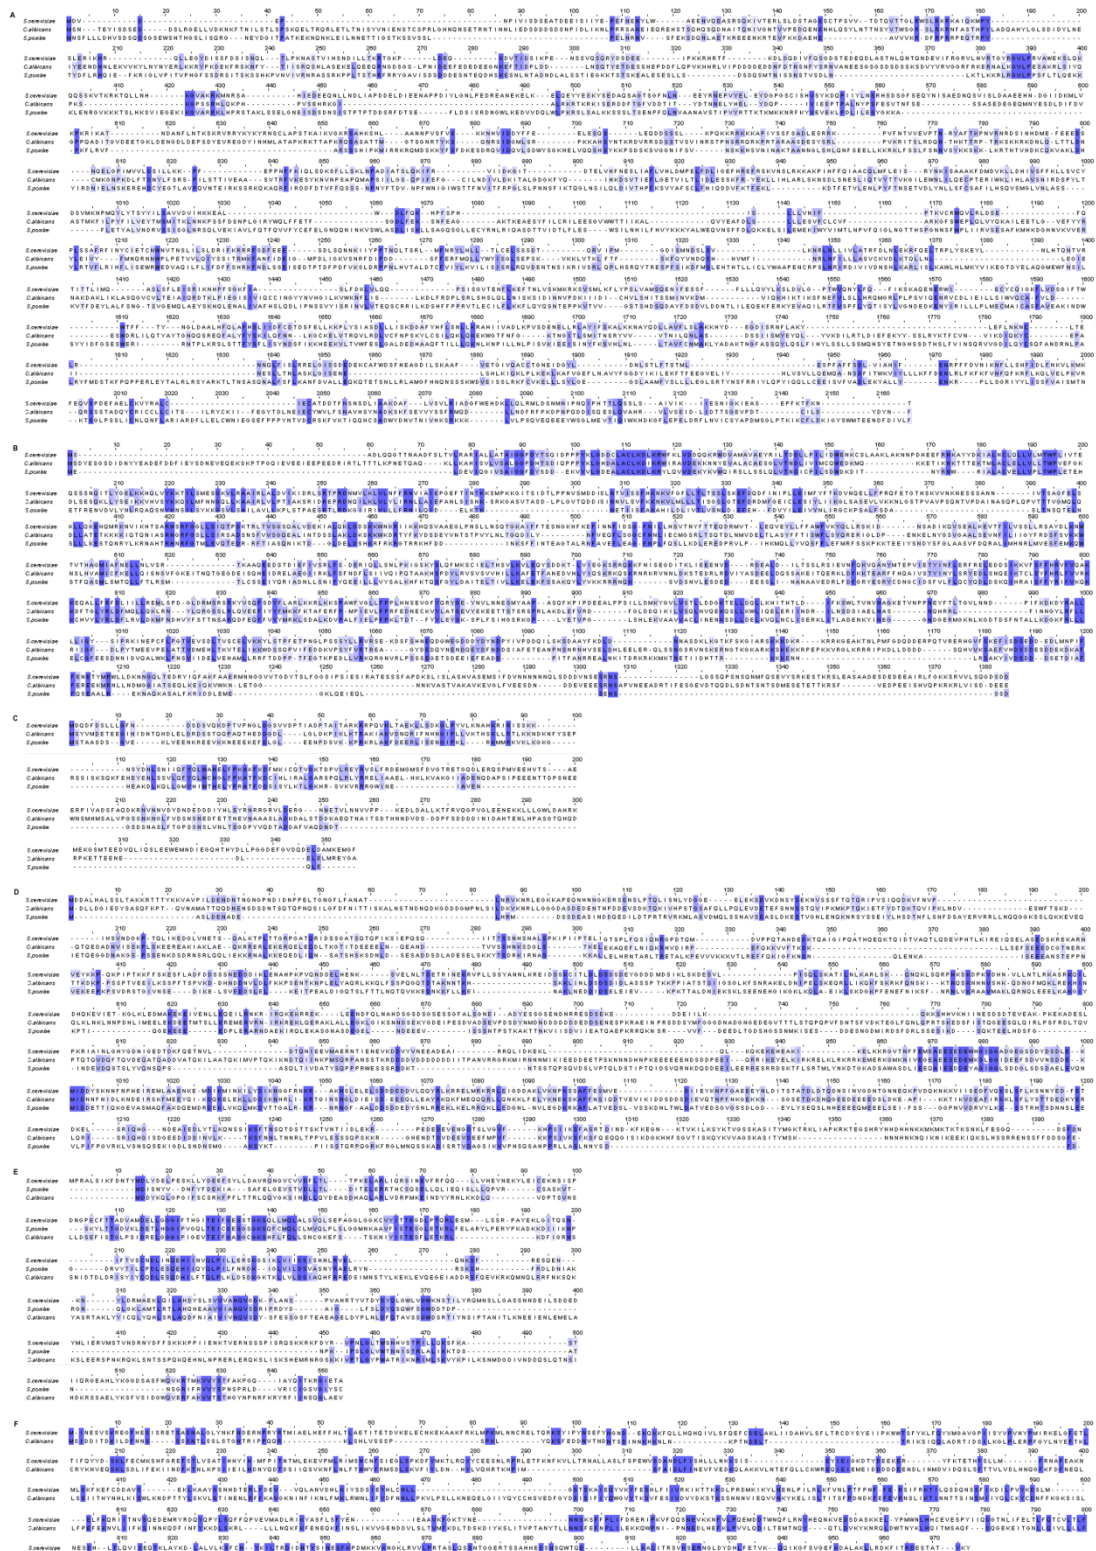

**Figure S1.** Protein sequence alignment of Mms22p (A), Tof1p (B), Csm3p (C), Mrc1p (D), Rad57p (E), and Rtt101p (F).
